# Supplementary material for: P-cadherin signals through the laminin receptor α6β4 integrin to induce stem cell and invasive properties in basal-like breast cancer cells
Source: PubMed Central journal article supplement (PMC3996674; doi:10.18632/oncotarget.1459), 2014-01-06
Supplement: oncotarget-05-0679-s001.pdf [file oncotarget-05-0679-s001.pdf]

**P-cadherin signals through the laminin receptor  $\alpha6\beta4$  integrin to induce stem cell and invasive properties to basal-like breast cancer cells- Vieira et al**

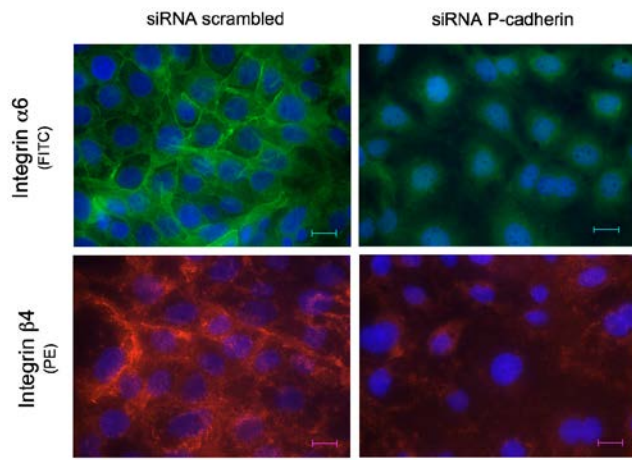

**Supplementary Figure 1.** Immunofluorescence staining of BT-20 cells after P-cadherin silencing revealed a decrease in  $\alpha6$  integrin and  $\beta4$  integrin expression (scale bar=20 $\mu$ m). Similar results were obtained for MDA-MB-468 cell line.

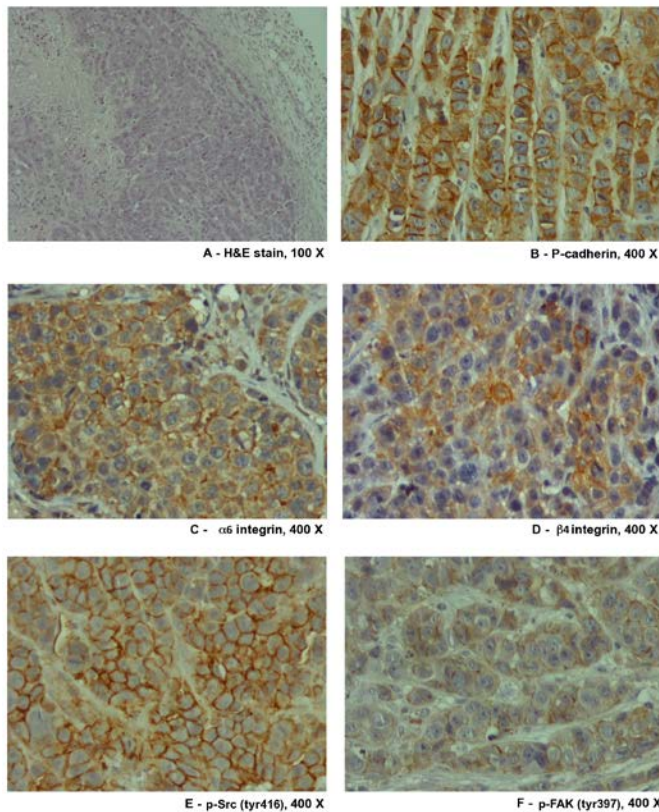

**Supplementary Figure 2.** Representative images of the Hematoxylin and Eosin staining (H&E) of the tumors formed *in vivo* by the MDA-MB-468 cell line in nude mice (A) and the IHC staining of a tumor case positive for P-cadherin (B),  $\alpha6$  integrin (C),  $\beta4$  integrin (D), pFAK (E) and pSrc (F).
